# Supplementary material for: Immune checkpoint inhibitors plus neoadjuvant chemotherapy in early triple-negative breast cancer: a systematic review and meta-analysis
Source: PubMed Central journal article supplement (PMC8609839; doi:10.1186/s12885-021-08997-w), 2021-11-23
Supplement: 12885_2021_8997_MOESM3_ESM.pdf [file 12885_2021_8997_MOESM3_ESM.pdf]

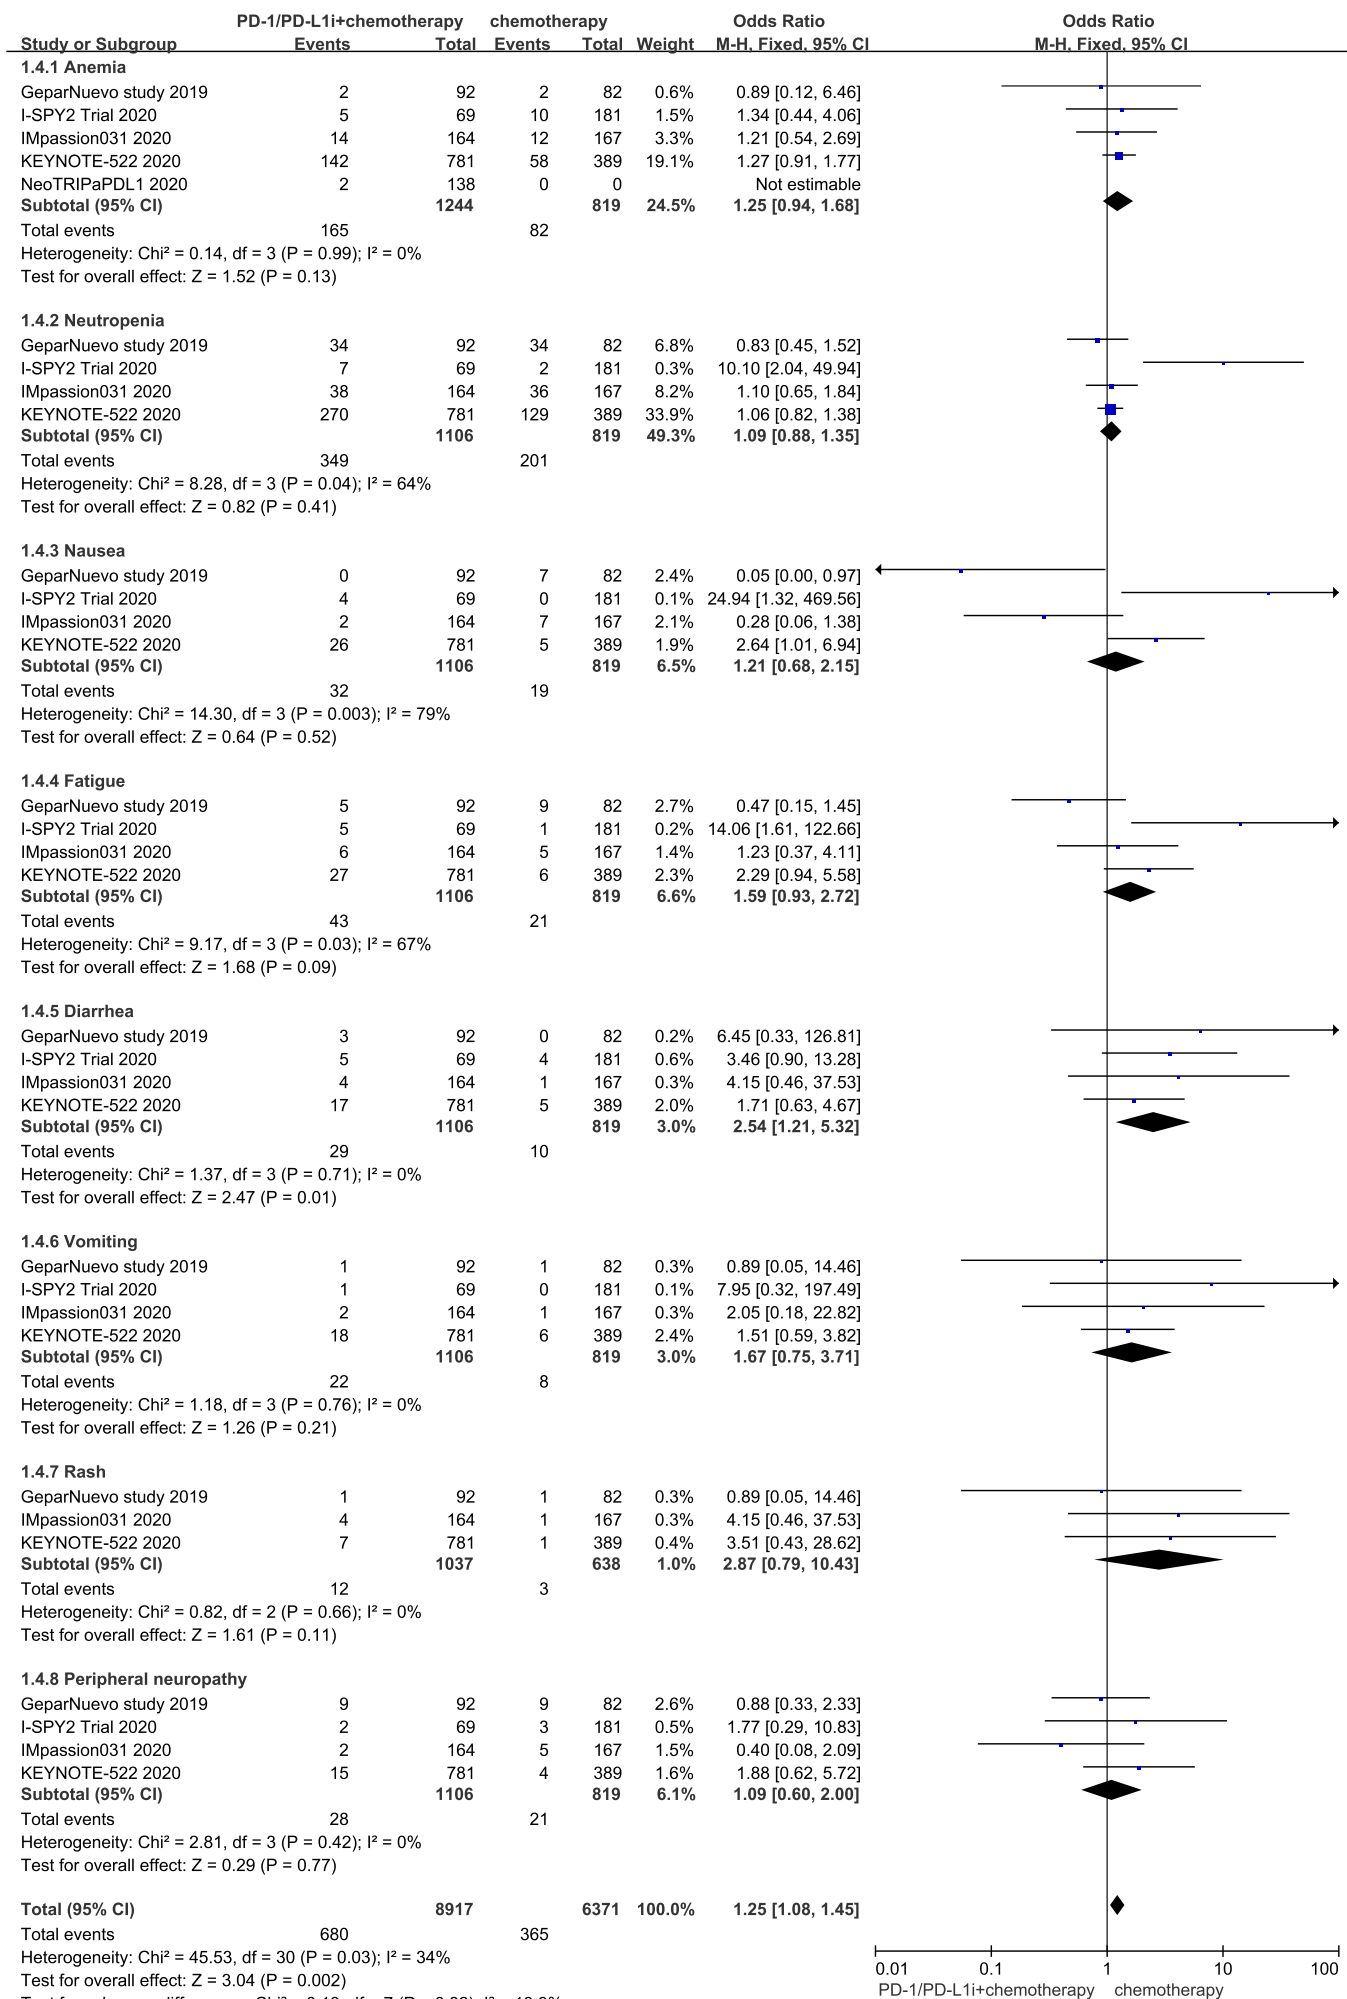

eFigure 2.
