# Supplementary material for: Immune checkpoint inhibitors plus neoadjuvant chemotherapy in early triple-negative breast cancer: a systematic review and meta-analysis
Source: PubMed Central journal article supplement (PMC8609839; doi:10.1186/s12885-021-08997-w), 2021-11-23
Supplement: 12885_2021_8997_MOESM5_ESM.pdf [file 12885_2021_8997_MOESM5_ESM.pdf]

|                       | Random sequence generation (selection bias) | Allocation concealment (selection bias) | Blinding of participants and personnel (performance bias) | Blinding of outcome assessment (detection bias) | Incomplete outcome data (attrition bias) | Selective reporting (reporting bias) | Other bias |
|-----------------------|---------------------------------------------|-----------------------------------------|-----------------------------------------------------------|-------------------------------------------------|------------------------------------------|--------------------------------------|------------|
| GeparNuevo study 2019 | +                                           | ?                                       | +                                                         | +                                               | +                                        | +                                    | +          |
| IMpassion031 2020     | +                                           | +                                       | +                                                         | +                                               | +                                        | +                                    | +          |
| I-SPY2 Trial 2020     | +                                           | ?                                       | -                                                         | +                                               | +                                        | -                                    | -          |
| KEYNOTE-522 2020      | +                                           | +                                       | +                                                         | ?                                               | +                                        | +                                    | +          |
| Nci 10013 2020        | +                                           | ?                                       | ?                                                         | ?                                               | +                                        | +                                    | -          |
| NeoTRIPaPDL1 2020     | +                                           | ?                                       | -                                                         | ?                                               | ?                                        | ?                                    | ?          |

eFigure 4.
